# Supplementary material for: Bovine serum albumin interactive one dimensional hexanuclear manganese(iii) complex: synthesis, structure, binding and molecular docking studies
Source: Royal Society of Chemistry journal article supplement (doi:10.1039/d1nj01492g), 2021-01-01
Supplement: d1nj01492g1.pdf [file d1nj01492g1.pdf]

### Supporting Information File

#### **Bovine Serum Albumin Interactive One Dimensional Hexanuclear Manganese (III) Complex: Synthesis, Structure, Binding and Molecular Docking Studies**

Rousunara Khatun<sup>a,c,†</sup>, Malay Dolai<sup>a,b,‡</sup>, Mihir Sasmal<sup>a</sup>, Nayim Sepay<sup>d</sup> and Mahammad Ali<sup>\*,a,c</sup>

<sup>a</sup>Department of Chemistry, Inorganic Section, Jadavpur University, 4 Raja S.C. Mullick Road, Kolkata-700032, India. E-mail: m\_ali2062@yahoo.com

<sup>b</sup>Department of Chemistry, Prabhat Kumar College, Purba Medinipur 721404, West Bengal, India.

<sup>c</sup>Vice Chancellor, Aliah University, II-A/27, Action Area II, Newtown, Kolkata, West Bengal 700156, India.

<sup>d</sup>Department of Chemistry, Lady Brabourne College, Kolkata 700 017, India.

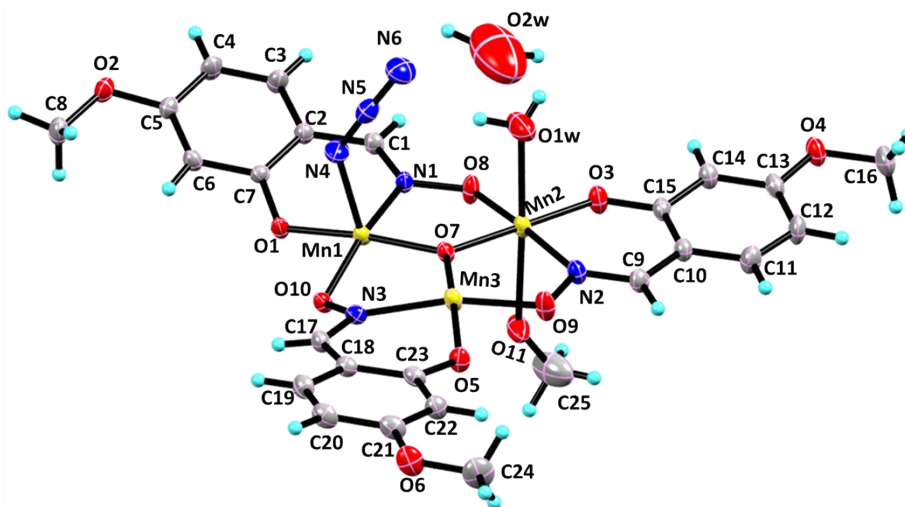

**Fig.S1** ORTEP diagram (30% ellipsoidal probability) of the asymmetric unit of the complex with atom numbering scheme.

**Table S 1:** Crystal data and Refinement parameters for Complex 1.

|                                       |                                                                                                   |
|---------------------------------------|---------------------------------------------------------------------------------------------------|
| Formula                               | C <sub>25</sub> H <sub>26</sub> Mn <sub>3</sub> N <sub>6</sub> O <sub>13</sub> , H <sub>2</sub> O |
| Formula Weight                        | 785.35 + 1                                                                                        |
| Crystal System                        | Monoclinic                                                                                        |
| Space group                           | P21/C (No. 14)                                                                                    |
| a, b, c [Å]                           | 10.0691(3) 22.5723(6)<br>13.2877(3)                                                               |
| α, β, γ [°]                           | 90 90.541(1) 90                                                                                   |
| V [Å <sup>3</sup> ]                   | 3019.93(14)                                                                                       |
| Z                                     | 4                                                                                                 |
| D(calc) [g/cm <sup>3</sup> ]          | 1.727                                                                                             |
| Mu(MoKα) [ /mm ]                      | 1.312                                                                                             |
| F(000)                                | 1596                                                                                              |
| Crystal Size [mm]                     | 0.34 × 0.25 × 0.18                                                                                |
| Data Collection                       |                                                                                                   |
| Temperature (K)                       | 273                                                                                               |
| Radiation [Å]                         | 0.71073                                                                                           |
| Theta Min-Max [°]                     | 1.8, 27.5                                                                                         |
| Dataset                               | -13: 13 ; -29: 29 ; -17: 17                                                                       |
| Tot., Uniq. Data, R(int)              | 13948, 6916, 0.032                                                                                |
| Observed data [I > 2.0 sigma(I)]      | 4256                                                                                              |
| Refinement                            |                                                                                                   |
| N <sub>ref.</sub> , N <sub>par.</sub> | 6916, 442                                                                                         |
| R, wR2, S                             | 0.0441, 0.1178, 1.07                                                                              |

## Computational details

The ground and excited state electronic structure calculation in gas phase of complex **1** have been carried out using DFT<sup>1</sup> method associated with the conductor-like polarizable continuum model (CPCM).<sup>2</sup> Becke's hybrid function<sup>3</sup> with the Lee-Yang-Parr (LYP) correlation function<sup>4</sup> was used throughout the study.

For C, H, N, O, and Mn atoms, we employed 6-31+g as basis set for all the calculations. All the calculations were performed with the Gaussian 09W software package.<sup>5</sup> Gauss Sum 2.1 program<sup>6</sup> was used to calculate the molecular orbital contributions from groups or atoms.

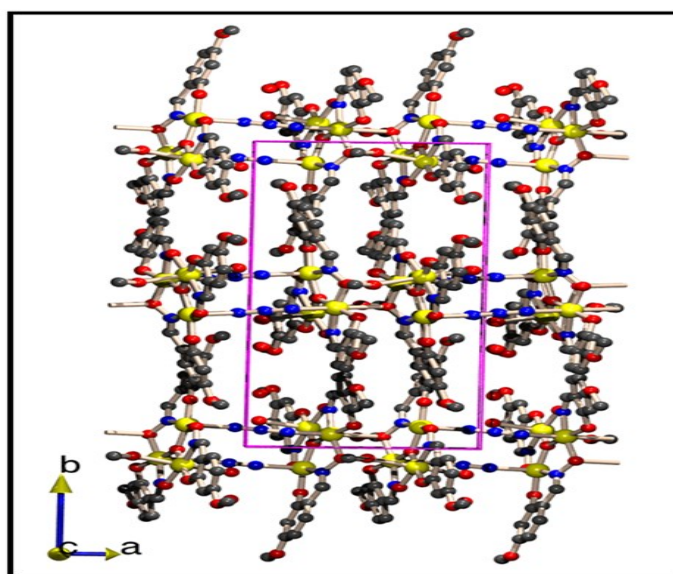

**Fig. S2:** The packing diagram of the polymeric chains of complex **1**.

**Table S2.** Selected bond distances (Å)

|            | Bond Distances |
|------------|----------------|
| Mn1 -O1    | 1.882(2)       |
| Mn1 -O7    | 1.879(2)       |
| Mn1 -O10   | 1.933(2)       |
| Mn1 -N1    | 1.978(3)       |
| Mn1 -N4    | 2.220(3)       |
| Mn1 -O10 b | 2.491(2)       |
| Mn2 -O1W   | 2.304(4)       |
| Mn2 -O3    | 1.869(2)       |
| Mn2 -O7    | 1.887(2)       |
| Mn2 -O8    | 1.911(2)       |
| Mn2 -O11   | 2.316(3)       |
| Mn2 -N2    | 1.995(3)       |
| Mn3 -O5    | 1.861(2)       |
| Mn3 -O7    | 1.883(2)       |
| Mn3 -O9    | 1.878(2)       |
| Mn3 -N3    | 1.988(3)       |
| Mn3 -N6 a  | 2.213(4)       |

$$a = -x, 1-y, 2-z$$

$$b = 1-x, 1-y, 2-z$$

**Table S3.** Selected Bond Angles (°) of complex-**1**

|             | Bond Angles |
|-------------|-------------|
| O1 -Mn1 -O7 | 172.41(9)   |

|                 |            |
|-----------------|------------|
| O1 -Mn1 -O10    | 88.01(9)   |
| O1 -Mn1 -N1     | 90.21(10)  |
| O1 -Mn1 -N4     | 90.84(10)  |
| O1 -Mn1 -O10_b  | 84.25(8)   |
| O7 -Mn1 -O10    | 91.03(9)   |
| O7 -Mn1 -N1     | 89.16(10)  |
| O7 -Mn1 -N4     | 96.74(10)  |
| O7 -Mn1 -O10_b  | 88.16(8)   |
| O10 -Mn1 -N1    | 167.86(11) |
| O10 -Mn1 -N4    | 95.96(11)  |
| O10 -Mn1 -O10_b | 81.84(8)   |
| N1 -Mn1 -N4     | 96.07(12)  |
| O10_b -Mn1 -N1  | 86.04(10)  |
| O10_b -Mn1 -N4  | 174.68(9)  |
| O1W -Mn2 -O3    | 89.35(12)  |
| O1W -Mn2 -O7    | 89.92(12)  |
| O1W -Mn2 -O8    | 90.74(13)  |
| O1W -Mn2 -O11   | 176.12(13) |
| O1W -Mn2 -N2    | 94.57(13)  |
| O3 -Mn2 -O7     | 179.14(9)  |
| O3 -Mn2 -O8     | 88.51(9)   |
| O3 -Mn2 -O11    | 94.36(10)  |
| O3 -Mn2 -N2     | 90.77(10)  |
| O7 -Mn2 -O8     | 91.96(9)   |
| O7 -Mn2 -O11    | 86.37(10)  |
| O7 -Mn2 -N2     | 88.83(10)  |
| O8 -Mn2 -O11    | 90.52(12)  |

**Table S4.** Hydrogen Bond table (Å, °)

| D-H...A         | D-H(Å) | H-A(Å) | D-A(Å)   | <D-H...A(°) | symmetry       |
|-----------------|--------|--------|----------|-------------|----------------|
| O1W -H2W1 .. N5 | 0.8500 | 2.4600 | 3.277(5) | 162.00      | .              |
| O1W -H2W1 .. N6 | 0.8500 | 2.3800 | 3.099(6) | 142.00      | .              |
| C1 -H1 .. O2    | 0.9300 | 2.5200 | 3.356(4) | 149.00      | x,1/2-y,-1/2+z |
| C4 -H4 .. O8    | 0.9300 | 2.4700 | 3.386(4) | 168.00      | x,1/2-y,1/2+z  |

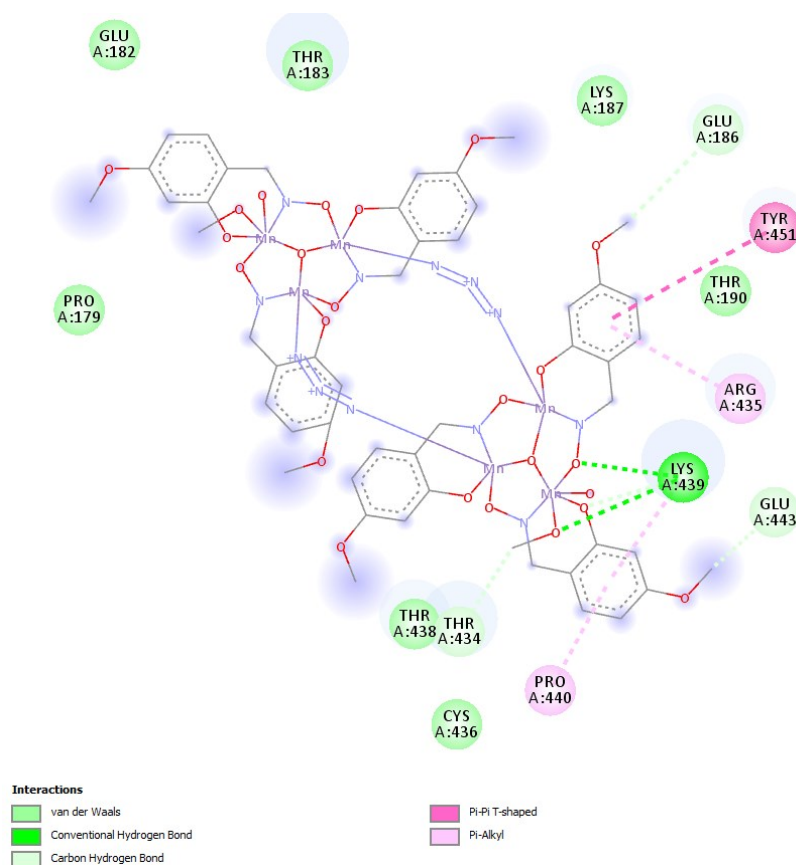

**Fig. S3:** Interactions of different amino acid residues of BSA with complex 1 in 2D view.

## References

1. R. G. Parr, *Horizons Quantum Chem.*, 1980, 5–15.
2. M. Cossi, N. Rega, G. Scalmani and V. Barone, *J. Comput. Chem.*, 2003, **24**, 669–681.
3. A. D. Becke, *J. Chem. Phys.*, 1993, **98**, 5648–5652.
4. C. Lee, W. Yang and R. G. Parr, *Phys. Rev. B*, 1988, **37**, 785–789.
5. M. J. Frisch, G. W. Trucks, H. B. Schlegel, G. E. Scuseria, M. A. Robb, J. R. Cheeseman, G. Scalmani, V. Barone, B. Mennucci, G. A. Petersson, H. Nakatsuji, M. Caricato, X. Li, H. P. Hratchian, A. F. Izmaylov, J. Bloino, G. Zheng, J. L. Sonnenberg, M. Hada, M. Ehara, K. Toyota, R. Fukuda, J. Hasegawa, M. Ishida, T. Nakajima, Y. Honda, O. Kitao, H. Nakai, T. Vreven, J. A. Montgomery Jr., J. E. Peralta, F. Ogliaro, M. Bearpark, J. J. Heyd, E. Brothers, K. N. Kudin, V. N. Staroverov, R. Kobayashi, J. Normand, K. Raghavachari, A. Rendell, J. C. Burant, S. S. Iyengar, J. Tomasi, M. Cossi, N. Rega, J. M. Millam, M. Klene, J. E. Knox, J. B. Cross, V. Bakken, C. Adamo, J. Jaramillo, R. Gomperts, R. E. Stratmann, O. Yazyev, A. J. Austin, R. Cammi, C. Pomelli, J. W. Ochterski, R. L. Martin, K. Morokuma, V. G. Zakrzewski, G. A. Voth, P. Salvador, J. J. Dannenberg, S. Dapprich, A. D. Daniels, Ö. Farkas, J. B. Foresman, J. V. Ortiz, J. Cioslowski and D. J. Fox, *Gaussian Inc.*, 2009, Wallingford CT.
6. N. M.; O’Boyle, A. L. Tenderholt and K. M. Langner, *J. Comput. Chem.* 2008, **29**, 839–845.
